# Supplementary material for: Long noncoding RNA MALAT1 promotes hepatic steatosis and insulin resistance by increasing nuclear SREBP-1c protein stability
Source: PubMed Central journal article supplement (PMC4776244; doi:10.1038/srep22640), 2016-03-03
Supplement: srep22640-s1.pdf [file srep22640-s1.pdf]

**Long noncoding RNA MALAT1 promotes hepatic steatosis and insulin resistance by increasing nuclear SREBP-1c protein stability**

Caifeng Yan<sup>1</sup>, Jinfeng Chen<sup>2</sup>, Nuoqi Chen<sup>3\*</sup>

<sup>1</sup>Department of Endocrinology, Clinical Medical College of Yangzhou University, Yangzhou, China; <sup>2</sup>Department of Endocrinology, Zhangzhou Affiliated Hospital of Fujian Medical University, No. 59, Shengli Road, Xiangcheng District, Zhangzhou, China; <sup>3</sup>Department of Endocrinology, Zhangzhou Affiliated Hospital of Fujian Medical University, Zhangzhou, China

\*Co-corresponding author: Nuoqi Chen, Department of Endocrinology, Zhangzhou Affiliated Hospital of Fujian Medical University, No. 59, Shengli Road, Xiangcheng District, Zhangzhou, 363000, China.

Tel/ Fax: 86-596-2082030

E-mail: [chenuoqi1016@sina.com](mailto:chenuoqi1016@sina.com)

**Table 1** Sequences of primers for real-time PCR.

| Primers for real-time PCR |           | Sequences                          |
|---------------------------|-----------|------------------------------------|
| MALAT1 (human)            | Sense     | 5'-CTTAAGCGCAGCGCCATTTT-3'         |
|                           | Antisense | 5'-CCTC CAAACCCCAAGACCAA-3'        |
| MALAT1 (mouse)            | Sense     | 5'-GAGTTCTAATTCTTTTTACTGCTCAATC-3' |
|                           | Antisense | 5'-AGAGCAGAGCAGCGTAGAGC-3'         |
| SREBP-1c (human)          | Sense     | 5'-GGATTGCACTTTCGAAGACATG-3'       |
|                           | Antisense | 5'-ACTCTGG ACCTGGGTGTGCAAG-3'      |
| SREBP-1c (mouse)          | Sense     | 5'-GTGAGCCTGACAAGCAATCA-3'         |
|                           | Antisense | 5'-GGTGCCTACAGAGCAAGAG-3'          |
| ACC1 (human)              | Sense     | 5'-GAATGTTTGGGGATATTTTCAG-3'       |
|                           | Antisense | 5'-TTCTGCTATCAGTCTGTCCAG-3'        |
| ACC1 (mouse)              | Sense     | 5'-GCTTATTGATCAGTTATGTGGCC-3'      |
|                           | Antisense | 5'-CTGCAGGTTCTCAATGCAAA-3'         |
| ACLY (human)              | Sense     | 5'-GCCCATCCCCAACCAGCCAC-3'         |
|                           | Antisense | 5'-TTGCAGGCGCCACCTCATCG-3'         |
| ACLY (mouse)              | Sense     | 5'-AAGAAGGAGGGGAAGCTGAT-3'         |
|                           | Antisense | 5'TCGCATGTCTGGGTTGTTTA3'           |
| SCD1 (human)              | Sense     | 5'-CCTCTACTTGGAAGACGACATTCG-3'     |
|                           | Antisense | 5'-GCAGCCGAGCTTTGTAAGAGC-3'        |
| SCD1 (mouse)              | Sense     | 5'-AAGATATTCACGACCCACC-3'          |
|                           | Antisense | 5'-CAGCCGTGCCTTGTAAGTTC-3'         |
| FAS (human)               | Sense     | 5'-CAAGAAGTGCACGGAGGTGT-3'         |
|                           | Antisense | 5'-AGCTGCCAGAGTCGGAGAAC-3'         |
| FAS (mouse)               | Sense     | 5'-GATCCTGGAACGAGAACAC-3'          |
|                           | Antisense | 5'-AGACTGTGGAACACGGTGGA-3'         |
| HMGR (human)              | Sense     | 5'-ACATTGTCACCGCCATCTACATTGC-3'    |
|                           | Antisense | 5'-GGCTTGCTGAGGTAGTAGGTTGGT-3'     |
| HMGR (mouse)              | Sense     | 5'-TACAACGCCACGCAGCAAACA-3'        |

---

|                        |           |                                |
|------------------------|-----------|--------------------------------|
|                        | Antisense | 5'-ACCAACCTTCCTACCTCAGCAA-3'   |
| LDLR (human)           | Sense     | 5'-CTGTCTCTGTTGCGGATACCAAGG-3' |
|                        | Antisense | 5'-GCGAGTAGATGTCCACACCATTCA-3' |
| LDLR (mouse)           | Sense     | 5'-AGCCATTTTCAGTGCCAATC-3'     |
|                        | Antisense | 5'-GAGGAGGGCTGTTGTCTCAC-3'     |
| PEPCK (human)          | Sense     | 5'-TGAGCTGTGTCAGCCTGATCAC-3'   |
|                        | Antisense | 5'-ACCGTCTTGCTTTCGACCTG-3'     |
| PEPCK (mouse)          | Sense     | 5'-GAGAAAGCATTCAACGCCAGG-3'    |
|                        | Antisense | 5'-CACAGATATGCCCATCCGAGTC-3'   |
| G-6-pase (human)       | Sense     | 5'-GAGATCATCTCCTTCGGAAGCG-3'   |
|                        | Antisense | 5'-TTAGTTATGCCCAGGATCAGCATG-3' |
| G-6-pase (mouse)       | Sense     | 5'-AGCTCCGTGCCTATAATAAAGCAG-3' |
|                        | Antisense | 5'-CATACGTTGGCTTTTTCTTTCCTC-3' |
| GAPDH (human)          | Sense     | 5'-ATGACATCAAGAAGGTGGTG-3'     |
|                        | Antisense | 5'-CATACCAGGAAATGAGCTTG-3'     |
| GAPDH (mouse)          | Sense     | 5'-GGCATTGTGGAAGGGCTCAT-3'     |
|                        | Antisense | 5'-GACACATTGGGGGTAGGAACAC-3'   |
| $\beta$ -Actin (human) | Sense     | 5'-GCAAGTGCTTCTAGGCGGAC-3'     |
|                        | Antisense | 5'-AAGAAAGGGTGTAACGCAGC-3'     |
| $\beta$ -Actin (mouse) | Sense     | 5'-AGGCCAACCGTGAAAAGATG-3'     |
|                        | Antisense | 5'-AGAGCATAGCCCTCGTAGATGG-3'   |

---
